# Supplementary material for: Bioactivity-Guided Synthesis: In Silico and In Vitro Studies of β-Glucosidase Inhibitors to Cope with Hepatic Cytotoxicity
Source: MDPI journal article supplement (doi:10.3390/molecules28186548), 2023-09-09
Supplement: s1 [file s1]

# Bioactivity-guided synthesis, in-silico and in-vitro studies of $\beta$ -glucosidase inhibitors to cope with hepatic cytotoxicity

Aneela Khushal<sup>a</sup>, Umar Farooq<sup>a\*</sup>, Sara Khan<sup>a\*</sup>, Azhar Rasul<sup>b</sup>, Tanveer A. Wani<sup>c</sup>, Seema Zargar<sup>c</sup>, Sohail Anjum Shahzad<sup>a</sup>, Syed Majid Bukhari<sup>a</sup>, Nazeer Ahmad Khan<sup>a</sup>

<sup>a</sup>Department of Chemistry, COMSATS University Islamabad, Abbottabad Campus, KPK, Pakistan

<sup>b</sup>Department of Zoology, GC University Faisalabad, Pakistan

Table S1. physical data of synthesized compounds.

| Sr. No. | Sample Code | Structure<br>Molecular formula<br>Molecular weight                                                                                                                                                | M.P (°C) | TLC system<br>& R <sub>f</sub> | colour      |
|---------|-------------|---------------------------------------------------------------------------------------------------------------------------------------------------------------------------------------------------|----------|--------------------------------|-------------|
| 1.      | Compound 1c | 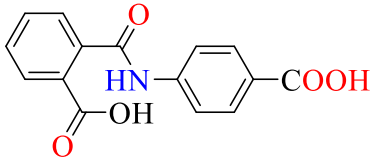<br><chem>OC(=O)c1ccccc1NC2=CC=C(C=C2)C(=O)O</chem>                                                              | 290-292  | 6:4<br>&<br>0.4                | White       |
| 2.      | Compound 2c | <br><chem>OC(=O)c1ccccc1NC2=CC=C(C=C2)C(F)(F)C(Cl)=C2</chem><br>$C_{15}H_7ClF_3NO_2$ 325.67 g/mol                | 200-203  | 6:4<br>&<br>0.53               | Off white   |
| 3.      | Compound 3c | <br><chem>OC(=O)c1cccc2c1c(c[nH]2)NC3=CC=C(C=C3)C(=O)O</chem><br>$C_{14}H_{10}ClNO_3$ 275.69 g/mol               | 180-183  | 6:4<br>&<br>0.4                | White       |
| 4.      | Compound 4c | <br><chem>OC(=O)c1ccccc1C(=O)NC2=CC=C(C=C2)NC3=CC=C(C=C3)[N+](=O)[O-]</chem><br>$C_{14}H_8N_2O_4$ 268.23 g/mol | 265-268  | 8:2<br>&<br>0.35               | Light green |
| 5.      | Compound 5c | <br><chem>OC(=O)c1ccccc1N2CCN(CC2Cc3c4ccccc4c(=O)n3C=O)C5=CC=CC=C5</chem><br>$C_{21}H_{21}N_3O_4$ 379.42 g/mol | 235-245  | 7:3<br>&<br>0.55               | White       |

|     |                 |                                                                                                                            |              |                     |                            |
|-----|-----------------|----------------------------------------------------------------------------------------------------------------------------|--------------|---------------------|----------------------------|
| 6.  | Compound<br>6c  | 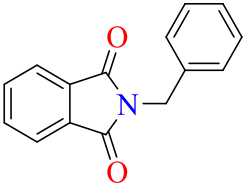<br><chem>C15H11NO2</chem> 237.26 g/mol   | 135-138      | 9:1<br>&<br>0.7     | White                      |
| 7.  | Compound<br>7c  | <br><chem>C15H11NO2</chem> 237.26 g/mol   | 200-202      | 7:3<br>&<br>0.53    | White<br>shiny<br>crystal  |
| 8.  | Compound<br>8c  | <br><chem>C14H15NO4</chem> 261.28 g/mol   | 155-157      | 8:2<br>&<br>0.4     | Off white                  |
| 9.  | Compound<br>9c/ |                                         |              |                     | White                      |
| 10. | Compound<br>10c | <br><chem>C16H13NO4</chem> 283.28 g/mol | 285-<br>295- | 6.5:3.5<br>&<br>0.6 | Light<br>purple            |
| 11. | Compound<br>11  | <br><chem>C14H8FNO2</chem> 241.22 g/mol | 198-200      | 8:2<br>&<br>0.55    | White<br>shiny<br>powdered |

|     |                         |                                                                                                                        |         |                      |                 |
|-----|-------------------------|------------------------------------------------------------------------------------------------------------------------|---------|----------------------|-----------------|
| 12. | <b>Compound<br/>12c</b> | 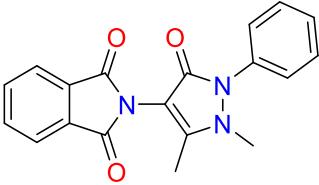<br>$C_{19}H_{15}N_3O_3$ 333.35 g/mol | 290-292 | 9.5:0.5<br>&<br>0.45 | light<br>orange |
| 13. | <b>Compound<br/>13</b>  | <br>$C_{14}H_9NO_2$ 223.23 g/mol      | 278-280 | 3:7<br>&<br>0.49     | White           |

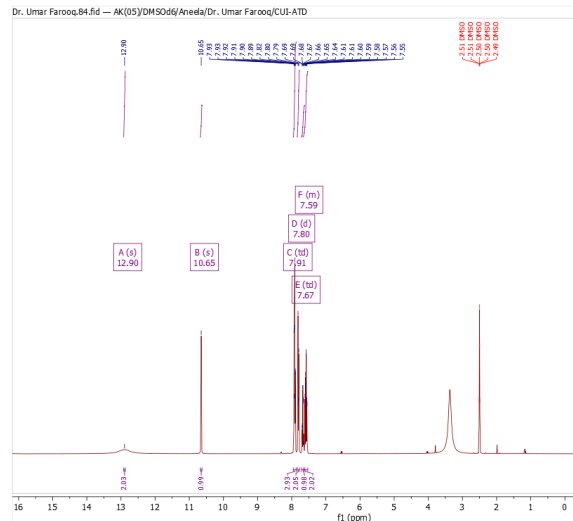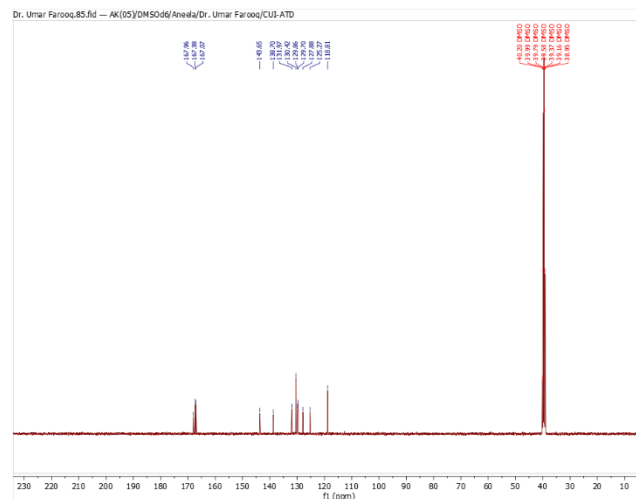

Supplementary Figure S1.  $^1\text{H}$  and  $^{13}\text{C}$  NMR spectra of compound 1C

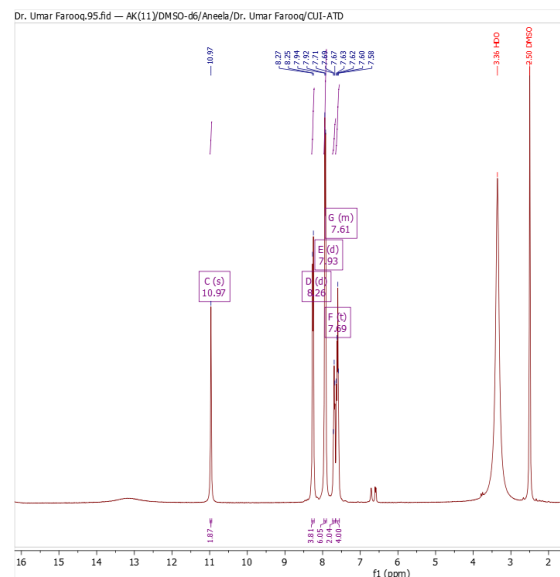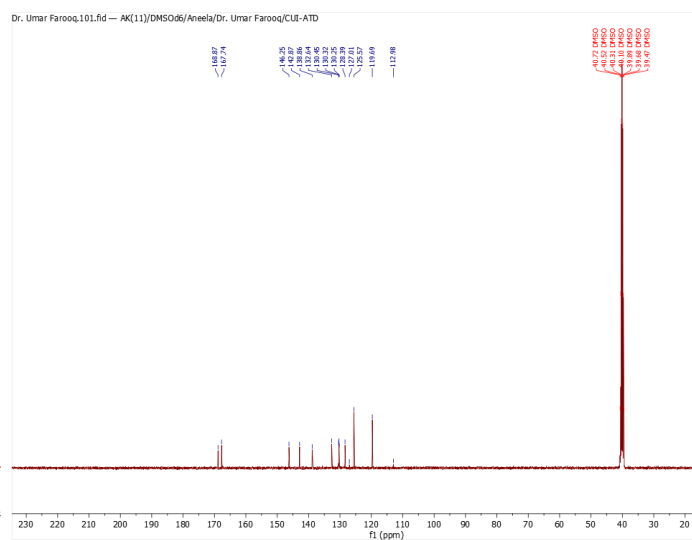

Supplementary Figure S2.  $^1\text{H}$  and  $^{13}\text{C}$  NMR spectra of compound 2C

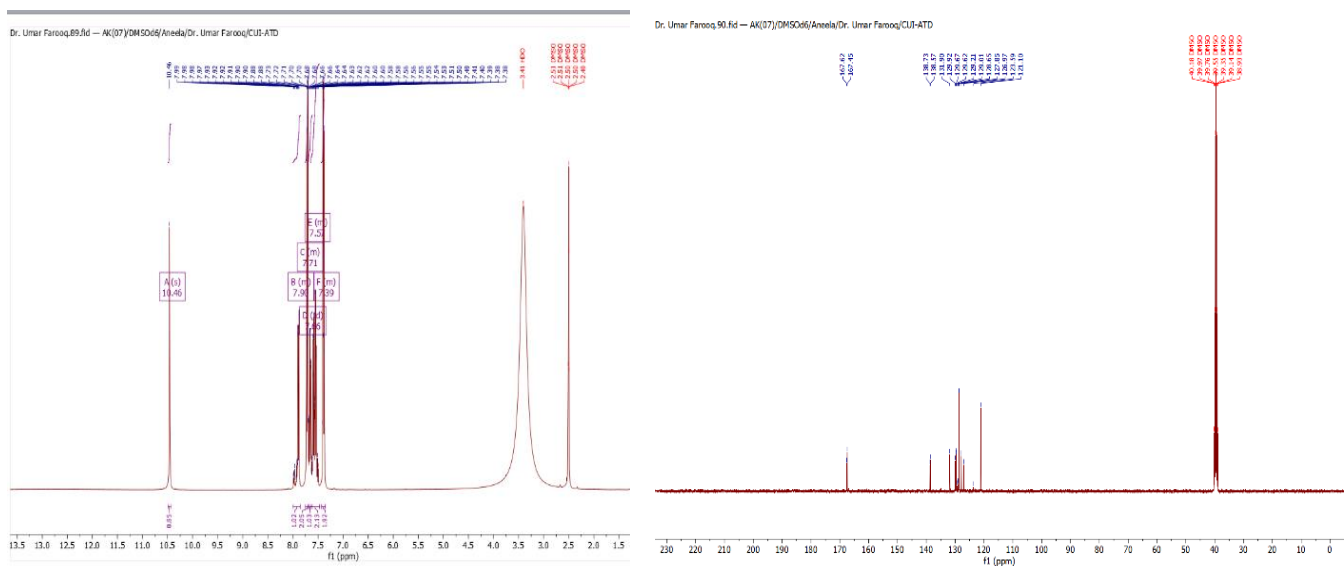





Dr. Umar Farooq, 80.fid  
AK(03)/CDCl<sub>3</sub>/Aneela/Dr. Umar Farooq/CUI-ATD

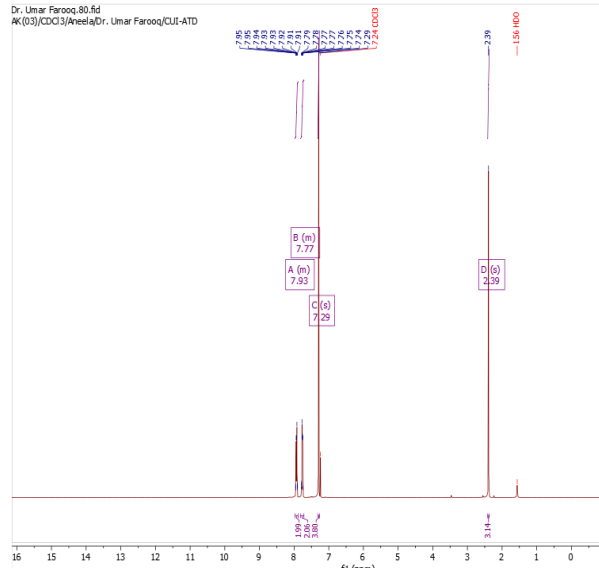

Dr. Umar Farooq, 82.fid  
AK(03)/CDCl<sub>3</sub>/Aneela/Dr. Umar Farooq/CUI-ATD

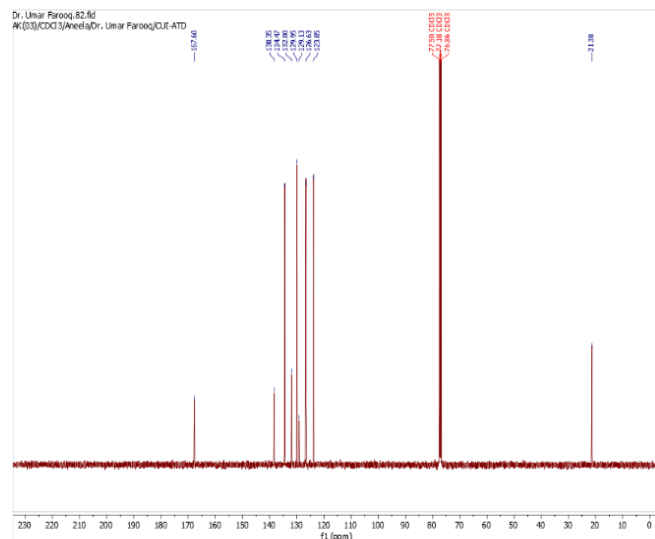

Supplementary Figure S7. <sup>1</sup>H and <sup>13</sup>C NMR spectra of compound 7c.

Dr. Umar Farooq, 81.fid  
AK(04)/CDCl<sub>3</sub>/Aneela/Dr. Umar Farooq/CUI-ATD

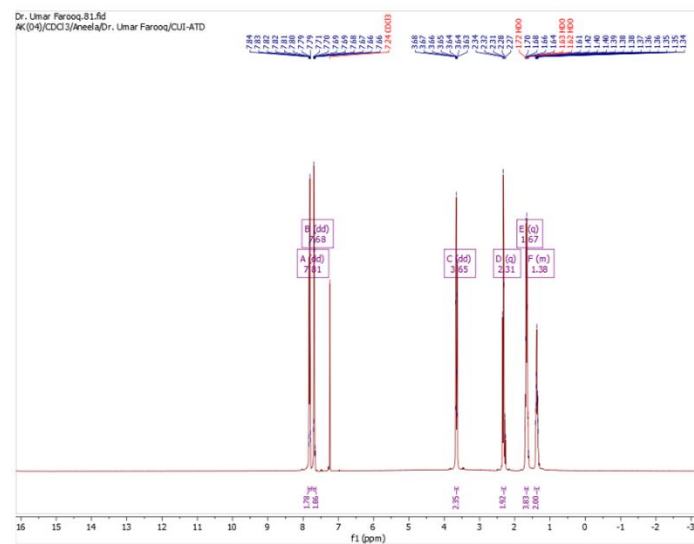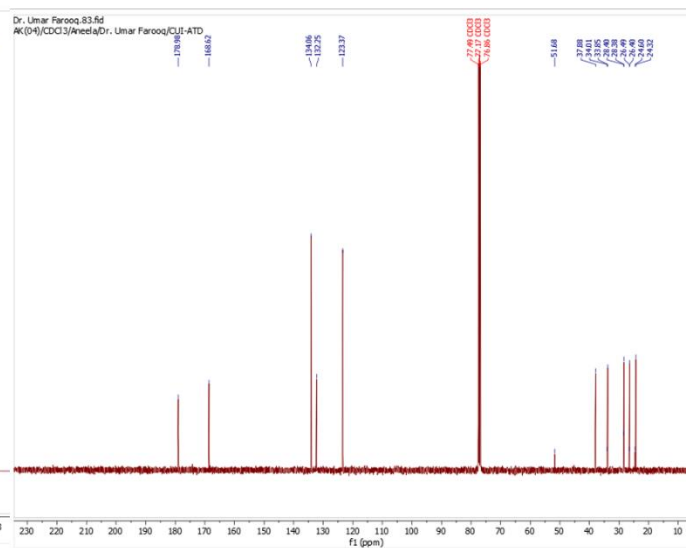

Supplementary Figure S8. <sup>1</sup>H and <sup>13</sup>C NMR spectra of compound 8c





**Supplementary Table S2.** ADME score for compound1c-12c as computed from ProTox server

|              | Molecular weight | Number of rotatable bonds | Number of hydrogen bond donor | Number of hydrogen bonds acceptors | GI absorption | Lipinski rule violation | Bioavailability Score | PAINS alerts | Lead likeness violation |
|--------------|------------------|---------------------------|-------------------------------|------------------------------------|---------------|-------------------------|-----------------------|--------------|-------------------------|
| Compound 1c  | 285.25           | 5                         | 5                             | 3                                  | High          | 0                       | 0.56                  | 0            | 0                       |
| Compound 2c  | 286.24           | 5                         | 5                             | 2                                  | High          | 0                       | 0.56                  | 0            | 0                       |
| Compound 3c  | 343.69           | 5                         | 6                             | 2                                  | High          | 0                       | 0.85                  | 0            | 1                       |
| Compound 4c  | 275.69           | 4                         | 3                             | 2                                  | High          | 0                       | 0.85                  | 0            | 1                       |
| Compound 5c  | 379.41           | 5                         | 5                             | 1                                  | High          | 0                       | 0.55                  | 0            | 1                       |
| Compound 6c  | 237.25           | 2                         | 2                             | 0                                  | High          | 0                       | 0.55                  | 0            | 1                       |
| Compound 7c  | 237.25           | 1                         | 2                             | 0                                  | High          | 0                       | 0.55                  | 0            | 1                       |
| Compound 8c  | 261.27           | 6                         | 4                             | 1                                  | High          | 0                       | 0.85                  | 0            | 1                       |
| Compound 9c  | 267.24           | 2                         | 4                             | 1                                  | High          | 0                       | 0.55                  | 0            | 0                       |
| Compound 10c | 237.25           | 2                         | 2                             | 0                                  | High          | 0                       | 0.55                  | 0            | 0                       |
| Compound 11c | 283.28           | 3                         | 4                             | 0                                  | High          | 0                       | 0.55                  | 0            | 1                       |
| Compound 12c | 261.27           | 6                         | 4                             | 1                                  | High          | 0                       | 0.85                  | 0            | 0                       |

**Supplementary Table S3.** Residues facilitating the binding of compound 1c-3c within the active site of  $\beta$ -glucosidase.

| Sample | $\Delta G$<br>kcal/mol |
|--------|------------------------|
| 1c     | -7.98                  |
| 2c     | -7.80                  |
| 3c     | -8.58                  |
| 4c     | -4.02                  |
| 5c     | -7.71                  |
| 6c     | -5.49                  |
| 7c     | -5.87                  |
| 8c     | -6.53                  |
| 9c     | -5.83                  |
| 10c    | -6.21                  |
| 11c    | -5.85                  |
| 12c    | -6.33                  |
| 13c    | -5.72                  |

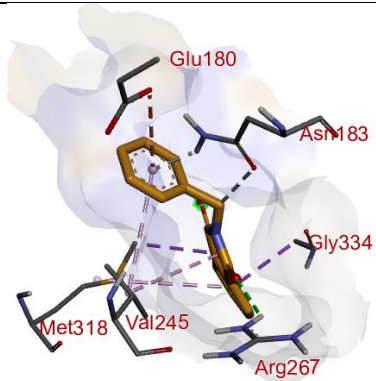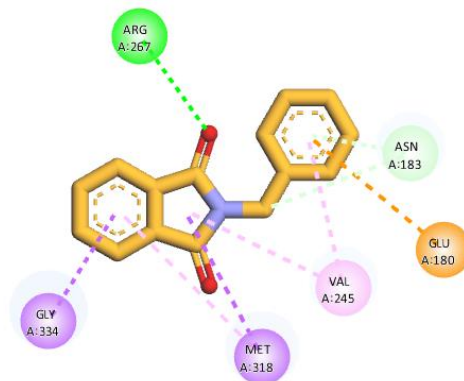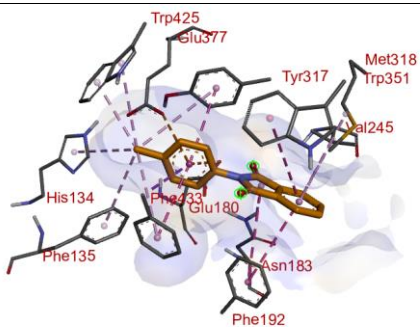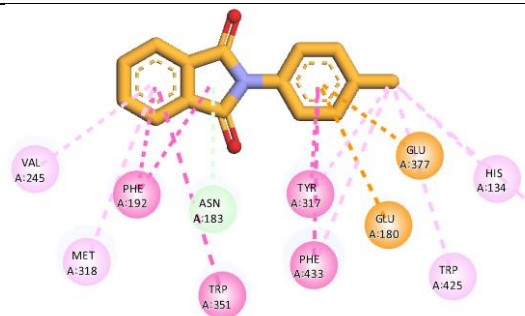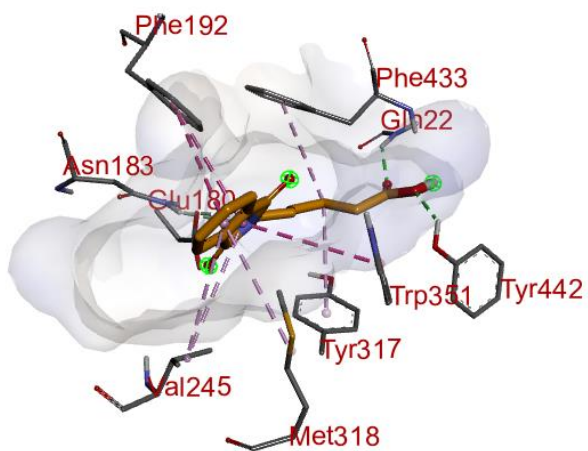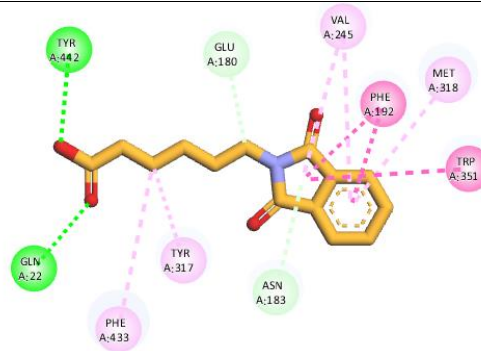

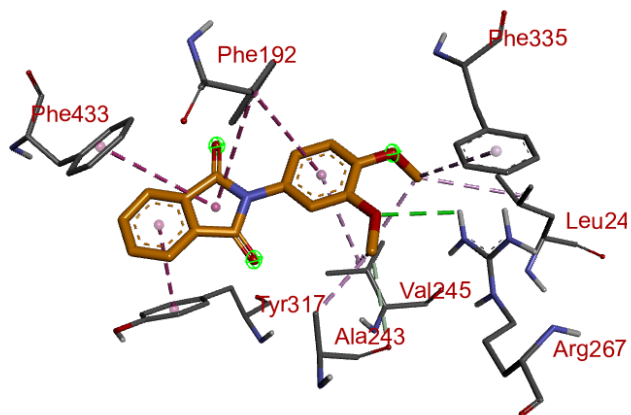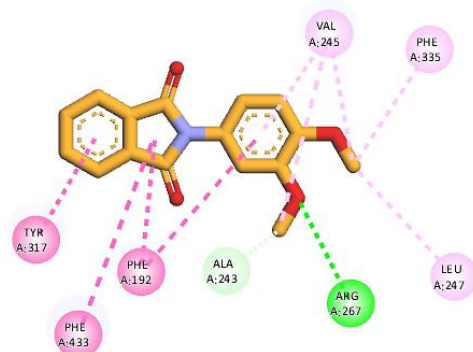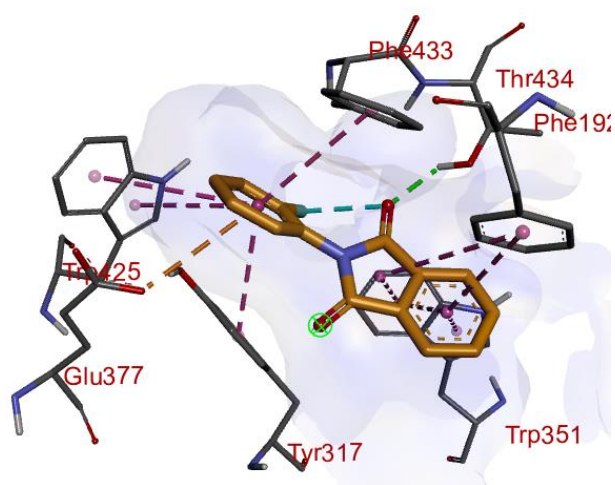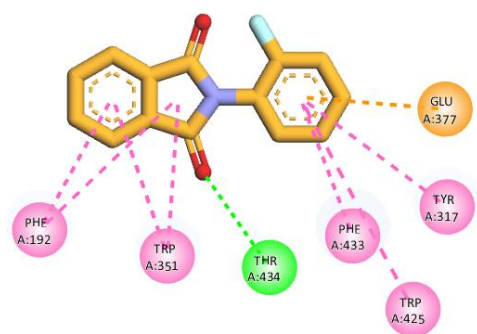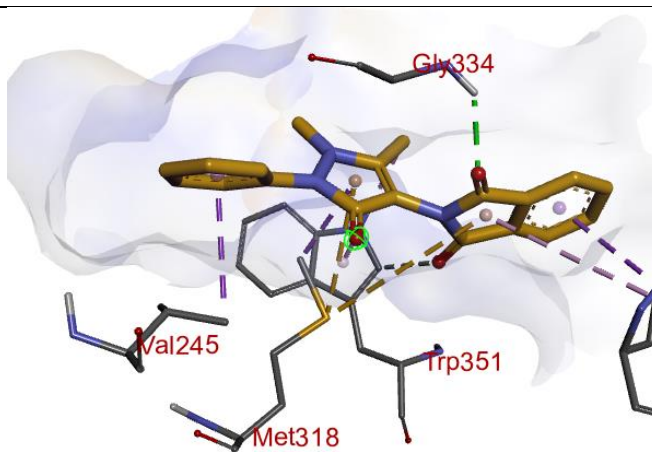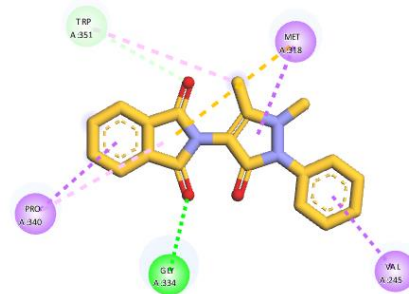

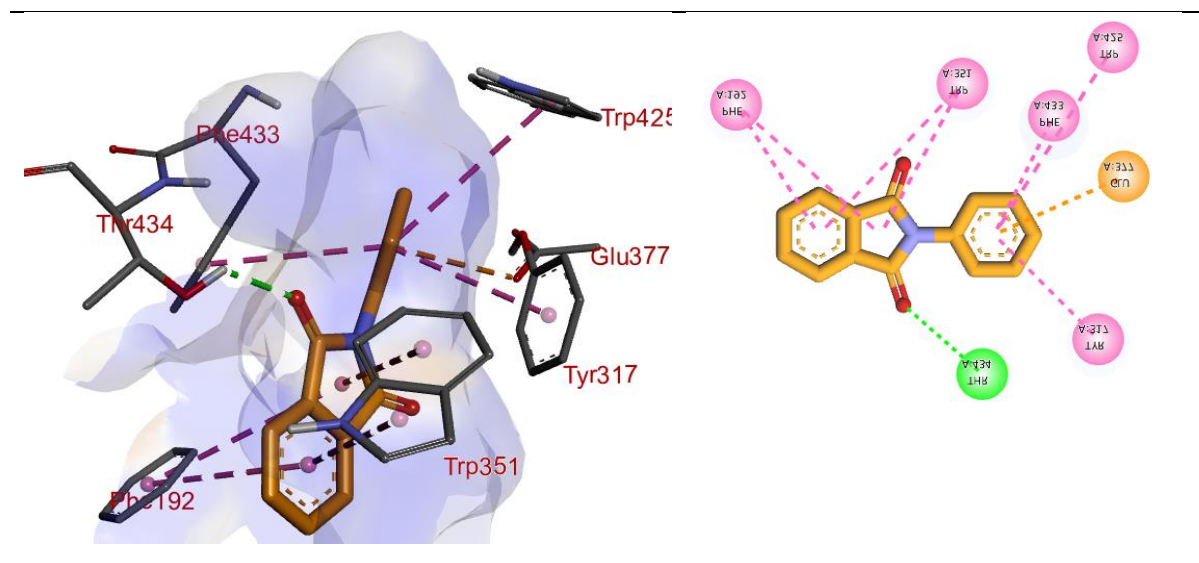

**Supplementary Scheme S1.** 2D and 3D binding interaction of compounds within the active pocket of  $\beta$ -glucosidase.

**Supplementary Table S4.** % inhibition and viability  $\pm$  SD against  $\beta$ -glucosidase and HEPG2 cancer cell lines.

| Sample                 | % inhibition $\pm$ SD<br>against $\beta$<br>glucosidase | IC <sub>50</sub> $\pm$ SEM<br>( $\mu$ M) | % viability $\pm$ SD<br>against HEPG2<br>cancer cell lines | IC <sub>50</sub><br>$\pm$<br>SEM ( $\mu$ M) |
|------------------------|---------------------------------------------------------|------------------------------------------|------------------------------------------------------------|---------------------------------------------|
| 1c                     | 76 $\pm$ 1.41                                           | 1.26 $\pm$ 0.23                          | 35.58 $\pm$ 3.65                                           | -                                           |
| 2c                     | 68 $\pm$ 1.41                                           | 2.17 $\pm$ 0.11                          | 29.35 $\pm$ 0.72                                           | -                                           |
| 3c                     | 70 $\pm$ 2.82                                           | 3.00 $\pm$ 0.17                          | 12.77 $\pm$ 1.47                                           | 8 $\pm$ 1.6                                 |
| 4c                     | 42 $\pm$ 1.42                                           | -                                        | 26.89 $\pm$ 1.05                                           | -                                           |
| 5c                     | 71 $\pm$ 1.2                                            | 1.26 $\pm$ 0.11                          | 42.22 $\pm$ 2.2                                            | -                                           |
| 6c                     | 45.0 $\pm$ 1.41                                         | -                                        | 32.8 $\pm$ 4.4                                             | -                                           |
| 7c                     | 63.5 $\pm$ 0.71                                         | 6.98 $\pm$ 0.31                          | 21.41 $\pm$ 3.4                                            | 12.8 $\pm$ 2.33                             |
| 8c                     | 70.5 $\pm$ 2.12                                         | 4.78 $\pm$ 0.27                          | 24.81 $\pm$ 4.6                                            | -                                           |
| 9c                     | 61.5 $\pm$ 0.12                                         | 6.8 $\pm$ 0.14                           | 36.3 $\pm$ 0.2                                             | -                                           |
| 10c                    | 50.5 $\pm$ 2.31                                         | -                                        | 20.54 $\pm$ 4.2                                            | 48 $\pm$ 2.18                               |
| 11c                    | 56.5 $\pm$ 2.45                                         | 9.57 $\pm$ 0.22                          | 40.84 $\pm$ 2.5                                            | -                                           |
| 12c                    | 45.2 $\pm$ 0.4                                          | -                                        | 26.89 $\pm$ 1.05                                           | -                                           |
| Acarbose<br>(standard) | 74% $\pm$ 1.32                                          | 2.15 $\pm$ 0.16                          |                                                            |                                             |



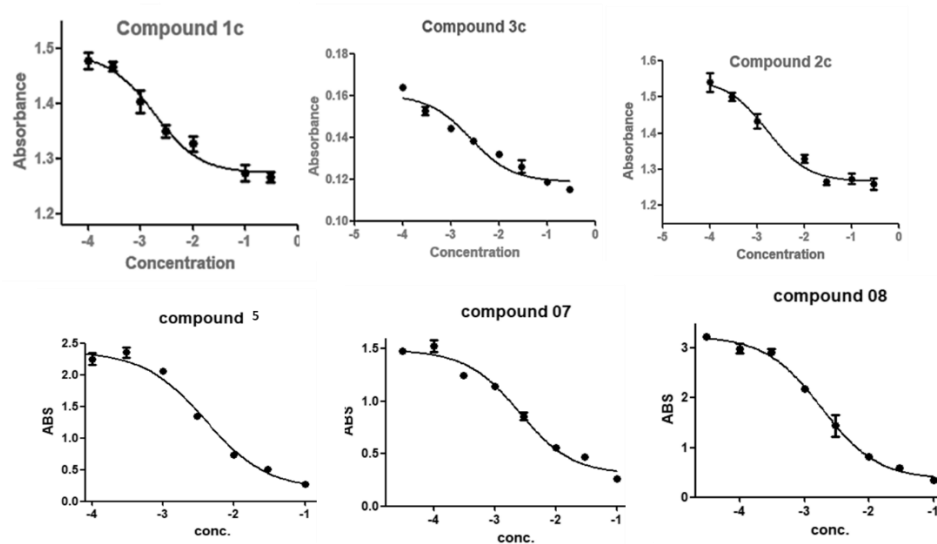

Supplementary Figure S13. IC<sub>50</sub> graphs of compound 1c, 2c and 3c against  $\beta$ -glucosidase

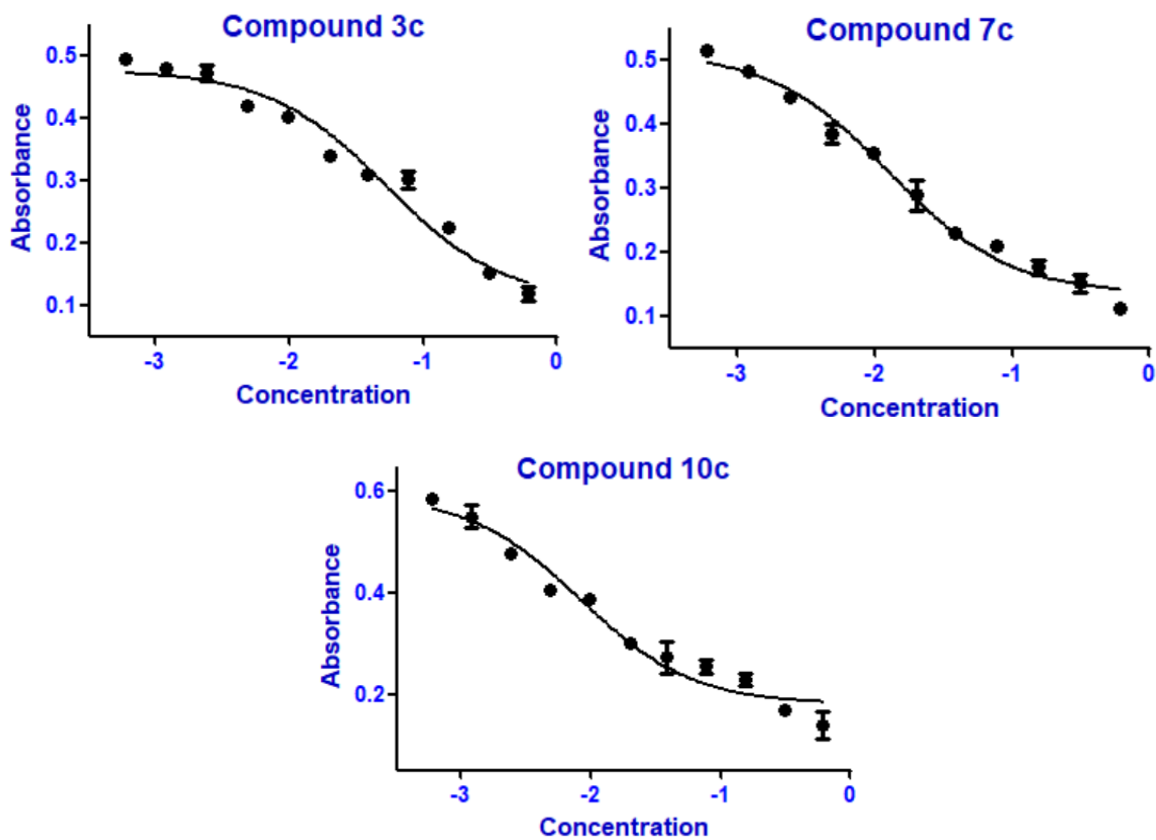

Supplementary Figure S14. IC<sub>50</sub> graphs of compound 3c against HepG2 cancer cell.

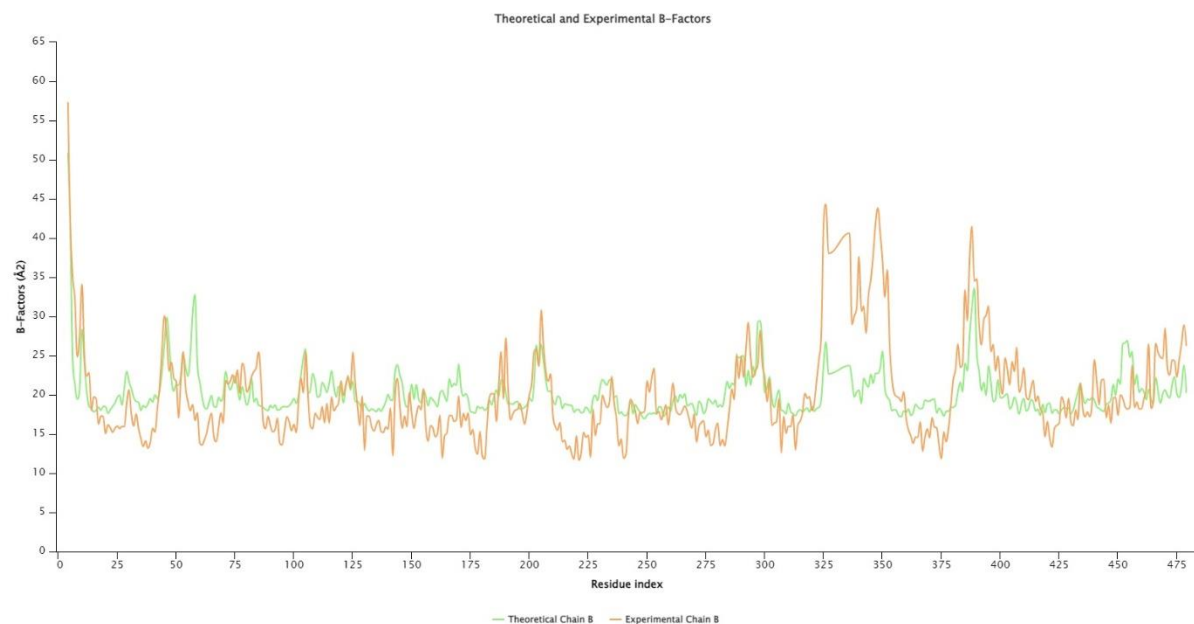

**Supplementary Figure S15.** theoretical and experimental B-factors of free protein.

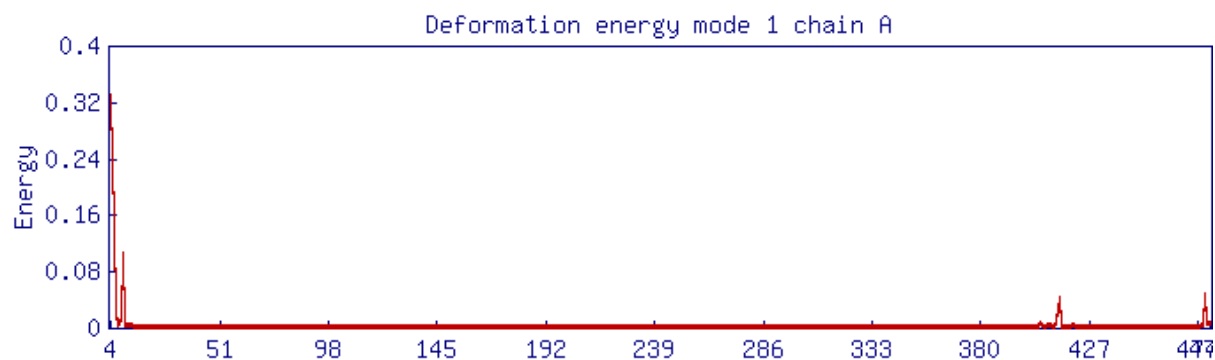

**Supplementary Figure S16.** Deformation energy of protein inhibitor complex.

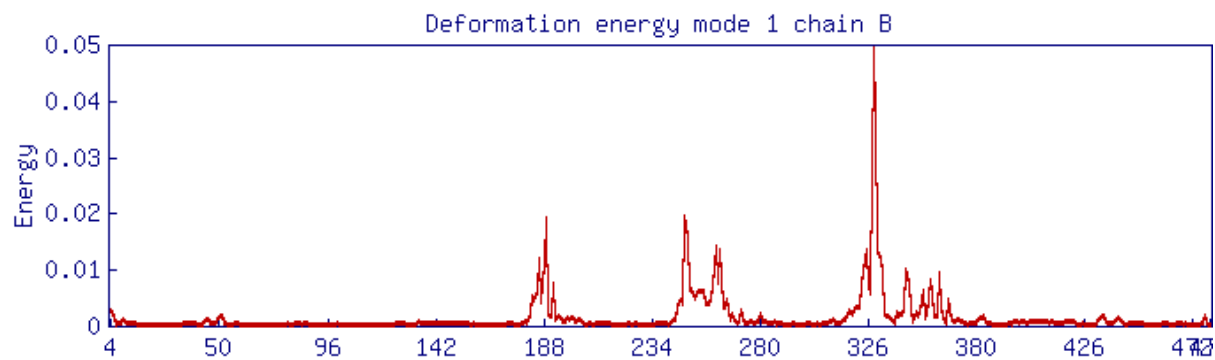

**Supplementary Figure S17.** Deformation energy of free protein.
